# Supplementary material
Source: PubMed Central journal article supplement (PMC8096671)
Supplement: NIHMS1668015-supplement-1668015_Supp_Fig1-5.pdf [file NIHMS1668015-supplement-1668015_Supp_Fig1-5.pdf]

**Supplementary Appendix to “Combining Structural Equation Modeling with Genomic-Relatedness-Matrix Restricted Maximum Likelihood in OpenMx” by R. M. Kirkpatrick et al.**

**Derivatives of the Restricted Loglikelihood**

Here, we show how the first and second derivatives of the restricted loglikelihood (which is used in REML analyses; Meyer & Smith, 1996) depend upon the first derivatives of the covariance matrix  $\mathbf{V}$ .

For ease of notation, we will consider derivatives with respect to two arbitrary parameters,  $\theta_i$  and  $\theta_j$ , and define:

$$\mathbf{A} \equiv \frac{\partial \mathbf{V}}{\partial \theta_i}$$

$$\mathbf{B} \equiv \frac{\partial \mathbf{V}}{\partial \theta_j}$$

The restricted loglikelihood is,

$$\ell = -0.5(\log|\mathbf{V}| + \log|\mathbf{X}^T \mathbf{V}^{-1} \mathbf{X}| + \mathbf{y}^T \mathbf{P} \mathbf{y})$$

, where  $\mathbf{X}$  is the matrix of covariates,  $\mathbf{y}$  is the vector of phenotype scores, and

$$\mathbf{P} = \mathbf{V}^{-1} - \mathbf{V}^{-1} \mathbf{X} (\mathbf{X}^T \mathbf{V}^{-1} \mathbf{X})^{-1} \mathbf{X}^T \mathbf{V}^{-1}$$

. Note that  $\mathbf{V}$ , and therefore  $\mathbf{P}$ , are functions of parameters, whereas  $\mathbf{X}$  and  $\mathbf{y}$  are not.

First, note that the derivative of  $\mathbf{V}^{-1}$  is

$$\frac{\partial \mathbf{V}^{-1}}{\partial \theta_i} = -\mathbf{V}^{-1} \frac{\partial \mathbf{V}}{\partial \theta_i} \mathbf{V}^{-1}$$

$$= -\mathbf{V}^{-1} \mathbf{A} \mathbf{V}^{-1}$$

. The first derivative of the first term of the loglikelihood is

$$\frac{\partial \log|\mathbf{V}|}{\partial \theta_i} = \text{tr} \left( \mathbf{V}^{-1} \frac{\partial \mathbf{V}}{\partial \theta_i} \right)$$

$$= \text{tr}(\mathbf{V}^{-1} \mathbf{A})$$

. The first derivative of the second term is

$$\frac{\partial \log|\mathbf{X}^T \mathbf{V}^{-1} \mathbf{X}|}{\partial \theta_i} = \text{tr} \left( [\mathbf{X}^T \mathbf{V}^{-1} \mathbf{X}]^{-1} \frac{\partial \mathbf{X}^T \mathbf{V}^{-1} \mathbf{X}}{\partial \theta_i} \right)$$

$$= \text{tr} \left( [\mathbf{X}^T \mathbf{V}^{-1} \mathbf{X}]^{-1} \mathbf{X}^T \frac{\partial \mathbf{V}^{-1}}{\partial \theta_i} \mathbf{X} \right)$$

$$= -\text{tr}([\mathbf{X}^T \mathbf{V}^{-1} \mathbf{X}]^{-1} \mathbf{X}^T \mathbf{V}^{-1} \mathbf{A} \mathbf{V}^{-1} \mathbf{X})$$

. The first derivative of the third term is cumbersome. First, we will let  $\mathbf{Q}$  denote a particular quadratic form in  $\mathbf{X}$ , specifically,

$$\mathbf{Q} = \mathbf{X}^T \mathbf{V}^{-1} \mathbf{X}$$

. Now, consider the following:

$$\frac{\partial \mathbf{Q}^{-1}}{\partial \theta_i} = -\mathbf{Q}^{-1} \frac{\partial \mathbf{X}^T \mathbf{V}^{-1} \mathbf{X}}{\partial \theta_i} \mathbf{Q}^{-1}$$

$$\begin{aligned}
&= -\mathbf{Q}^{-1}\mathbf{X}^T \frac{\partial \mathbf{V}^{-1}}{\partial \theta_i} \mathbf{X}\mathbf{Q}^{-1} \\
&= \mathbf{Q}^{-1}\mathbf{X}^T \mathbf{V}^{-1} \mathbf{A} \mathbf{V}^{-1} \mathbf{X}\mathbf{Q}^{-1}
\end{aligned}$$

. Applying the Product Rule, we further have:

$$\begin{aligned}
\frac{\partial \mathbf{Q}^{-1}\mathbf{X}^T \mathbf{V}^{-1}}{\partial \theta_i} &= \mathbf{Q}^{-1} \frac{\partial \mathbf{X}^T \mathbf{V}^{-1}}{\partial \theta_i} + \frac{\partial \mathbf{Q}^{-1}}{\partial \theta_i} \mathbf{X}^T \mathbf{V}^{-1} \\
&= -\mathbf{Q}^{-1}\mathbf{X}^T \mathbf{V}^{-1} \mathbf{A} \mathbf{V}^{-1} + \mathbf{Q}^{-1}\mathbf{X}^T \mathbf{V}^{-1} \mathbf{A} \mathbf{V}^{-1} \mathbf{X}\mathbf{Q}^{-1} \mathbf{X}^T \mathbf{V}^{-1}
\end{aligned}$$

. Again applying the Product Rule, we also have:

$$\begin{aligned}
\frac{\partial (\mathbf{V}^{-1}\mathbf{X})\mathbf{Q}^{-1}\mathbf{X}^T \mathbf{V}^{-1}}{\partial \theta_i} &= (\mathbf{V}^{-1}\mathbf{X}) \frac{\partial \mathbf{Q}^{-1}\mathbf{X}^T \mathbf{V}^{-1}}{\partial \theta_i} + \frac{\partial (\mathbf{V}^{-1}\mathbf{X})}{\partial \theta_i} \mathbf{Q}^{-1}\mathbf{X}^T \mathbf{V}^{-1} \\
&= (\mathbf{V}^{-1}\mathbf{X})(-\mathbf{Q}^{-1}\mathbf{X}^T \mathbf{V}^{-1} \mathbf{A} \mathbf{V}^{-1} + \mathbf{Q}^{-1}\mathbf{X}^T \mathbf{V}^{-1} \mathbf{A} \mathbf{V}^{-1} \mathbf{X}\mathbf{Q}^{-1} \mathbf{X}^T \mathbf{V}^{-1}) - \mathbf{V}^{-1} \mathbf{A} \mathbf{V}^{-1} \mathbf{X}\mathbf{Q}^{-1} \mathbf{X}^T \mathbf{V}^{-1} \\
&= -\mathbf{V}^{-1} \mathbf{X}\mathbf{Q}^{-1} \mathbf{X}^T \mathbf{V}^{-1} \mathbf{A} \mathbf{V}^{-1} + \mathbf{V}^{-1} \mathbf{X}\mathbf{Q}^{-1} \mathbf{X}^T \mathbf{V}^{-1} \mathbf{A} \mathbf{V}^{-1} \mathbf{X}\mathbf{Q}^{-1} \mathbf{X}^T \mathbf{V}^{-1} \\
&\quad - \mathbf{V}^{-1} \mathbf{A} \mathbf{V}^{-1} \mathbf{X}\mathbf{Q}^{-1} \mathbf{X}^T \mathbf{V}^{-1}
\end{aligned}$$

. Now, the derivative of  $\mathbf{P}$ :

$$\begin{aligned}
\frac{\partial \mathbf{P}}{\partial \theta_i} &= \frac{\partial \mathbf{V}^{-1}}{\partial \theta_i} - \frac{\partial (\mathbf{V}^{-1}\mathbf{X})\mathbf{Q}^{-1}\mathbf{X}^T \mathbf{V}^{-1}}{\partial \theta_i} \\
&= -\mathbf{V}^{-1} \mathbf{A} \mathbf{V}^{-1} + \mathbf{V}^{-1} \mathbf{X}\mathbf{Q}^{-1} \mathbf{X}^T \mathbf{V}^{-1} \mathbf{A} \mathbf{V}^{-1} - \mathbf{V}^{-1} \mathbf{X}\mathbf{Q}^{-1} \mathbf{X}^T \mathbf{V}^{-1} \mathbf{A} \mathbf{V}^{-1} \mathbf{X}\mathbf{Q}^{-1} \mathbf{X}^T \mathbf{V}^{-1} \\
&\quad + \mathbf{V}^{-1} \mathbf{A} \mathbf{V}^{-1} \mathbf{X}\mathbf{Q}^{-1} \mathbf{X}^T \mathbf{V}^{-1} \\
&= \mathbf{V}^{-1} \mathbf{X}\mathbf{Q}^{-1} \mathbf{X}^T \mathbf{V}^{-1} \mathbf{A} [\mathbf{V}^{-1} - \mathbf{V}^{-1} \mathbf{X}(\mathbf{X}^T \mathbf{V}^{-1} \mathbf{X})^{-1} \mathbf{X}^T \mathbf{V}^{-1}] \\
&\quad - \mathbf{V}^{-1} \mathbf{A} [\mathbf{V}^{-1} - \mathbf{V}^{-1} \mathbf{X}(\mathbf{X}^T \mathbf{V}^{-1} \mathbf{X})^{-1} \mathbf{X}^T \mathbf{V}^{-1}] \\
&= \mathbf{V}^{-1} \mathbf{X}\mathbf{Q}^{-1} \mathbf{X}^T \mathbf{V}^{-1} \mathbf{A} \mathbf{P} - \mathbf{V}^{-1} \mathbf{A} \mathbf{P} \\
&= -[\mathbf{V}^{-1} - \mathbf{V}^{-1} \mathbf{X}(\mathbf{X}^T \mathbf{V}^{-1} \mathbf{X})^{-1} \mathbf{X}^T \mathbf{V}^{-1}] \mathbf{A} \mathbf{P} \\
&= -\mathbf{P} \mathbf{A} \mathbf{P}
\end{aligned}$$

Naturally,

$$\frac{\partial \mathbf{y}^T \mathbf{P} \mathbf{y}}{\partial \theta_i} = -\mathbf{y}^T \mathbf{P} \mathbf{A} \mathbf{P} \mathbf{y}$$

, which is the derivative of the third term of the loglikelihood.

Putting it all together,

$$\frac{\partial \ell}{\partial \theta_i} = -0.5 [\text{tr}(\mathbf{V}^{-1} \mathbf{A}) - \text{tr}([\mathbf{X}^T \mathbf{V}^{-1} \mathbf{X}]^{-1} \mathbf{X}^T \mathbf{V}^{-1} \mathbf{A} \mathbf{V}^{-1} \mathbf{X}) - \mathbf{y}^T \mathbf{P} \mathbf{A} \mathbf{P} \mathbf{y}]$$

. Because traces of a matrix product are invariant under cyclic permutations of the factors,

$$\text{tr}([\mathbf{X}^T \mathbf{V}^{-1} \mathbf{X}]^{-1} \mathbf{X}^T \mathbf{V}^{-1} \mathbf{A} \mathbf{V}^{-1} \mathbf{X}) = \text{tr}(\mathbf{V}^{-1} \mathbf{X}\mathbf{Q}^{-1} \mathbf{X}^T \mathbf{V}^{-1} \mathbf{A})$$

. Furthermore, the trace of a sum of square matrices is the sum of the traces. Therefore,

$$\begin{aligned}
\frac{\partial \ell}{\partial \theta_i} &= -0.5 [\text{tr}(\mathbf{V}^{-1} \mathbf{A} - \mathbf{V}^{-1} \mathbf{X}\mathbf{Q}^{-1} \mathbf{X}^T \mathbf{V}^{-1} \mathbf{A}) - \mathbf{y}^T \mathbf{P} \mathbf{A} \mathbf{P} \mathbf{y}] \\
&= -0.5 [\text{tr}(\mathbf{P} \mathbf{A}) - \mathbf{y}^T \mathbf{P} \mathbf{A} \mathbf{P} \mathbf{y}]
\end{aligned}$$

We will here make two assumptions about  $\mathbf{A}$  and  $\mathbf{B}$ . First, we will assume that  $\mathbf{A}$  and  $\mathbf{B}$  are symmetric, that is,  $\mathbf{A} = \mathbf{A}^T$  and  $\mathbf{B} = \mathbf{B}^T$ . Second, we will assume that  $\frac{\partial \mathbf{A}}{\partial \theta_j} = \mathbf{0}$  and  $\frac{\partial \mathbf{B}}{\partial \theta_j} = \mathbf{0}$ . If the latter assumption is not true, then our result below for the second derivatives of the loglikelihood will not be exactly accurate, but may be a reasonable approximation in some cases.

We will now evaluate the second derivative of the loglikelihood:

$$\frac{\partial^2 \ell}{\partial \theta_i \partial \theta_j} = -0.5 \left[ \frac{\partial \text{tr}(\mathbf{PA})}{\partial \theta_j} - \frac{\partial \mathbf{y}^T \mathbf{PAPy}}{\partial \theta_j} \right]$$

. The matrix trace is a linear operator, so

$$\frac{\partial \text{tr}(\mathbf{PA})}{\partial \theta_j} = \text{tr} \left( \frac{\partial \mathbf{PA}}{\partial \theta_j} \right)$$

, and since we assume that  $\frac{\partial \mathbf{A}}{\partial \theta_j} = \mathbf{0}$ ,

$$\text{tr} \left( \frac{\partial \mathbf{PA}}{\partial \theta_j} \right) = -\text{tr}(\mathbf{PBPA})$$

. Note that  $\mathbf{y}^T \mathbf{PAPy}$  evaluates to a scalar, and therefore,  $\mathbf{y}^T \mathbf{PAPy} = \text{tr}(\mathbf{y}^T \mathbf{PAPy})$ , and

$$\frac{\partial \text{tr}(\mathbf{y}^T \mathbf{PAPy})}{\partial \theta_j} = \text{tr} \left( \frac{\partial \mathbf{y}^T \mathbf{PAPy}}{\partial \theta_j} \right)$$

$$= \text{tr} \left( \mathbf{y}^T \mathbf{PA} \frac{\partial \mathbf{Py}}{\partial \theta_j} + \frac{\partial \mathbf{y}^T \mathbf{PA}}{\partial \theta_j} \mathbf{Py} \right)$$

$$= \text{tr}(-\mathbf{y}^T \mathbf{PAPBPpy} - \mathbf{y}^T \mathbf{PBPAPpy})$$

. Since the trace of a sum is the sum of the traces,

$$= -\text{tr}(\mathbf{y}^T \mathbf{PAPBPpy}) - \text{tr}(\mathbf{y}^T \mathbf{PBPAPpy})$$

. And, since the trace of a transpose equals the trace of the original matrix,

$$= -\text{tr}(\mathbf{y}^T \mathbf{PAPBPpy}) - \text{tr}([\mathbf{y}^T \mathbf{PAPBPpy}]^T)$$

, and since we assume that  $\mathbf{A}$  and  $\mathbf{B}$  are symmetric,

$$= -2\text{tr}(\mathbf{y}^T \mathbf{PAPBPpy})$$

Putting it all together,

$$\frac{\partial^2 \ell}{\partial \theta_i \partial \theta_j} = 0.5\text{tr}(\mathbf{PBPA}) + \text{tr}(\mathbf{y}^T \mathbf{PAPBPpy})$$

$$= 0.5\text{tr}(\mathbf{PBPA}) + \mathbf{y}^T \mathbf{PAPBPpy}$$

### Worked Example of Analytic Derivatives

Here, we will consider the analytic derivatives of the  $\mathbf{V}$  matrix for an extension of the factor model described in the main text that also biometrically decomposes the unique-factor variances. This section also explains the analytic derivatives of  $\mathbf{V}$  used in script #2 in Table I, except that script is for 5 phenotypes instead of 3.

The present model has 10 free parameters:  $V_{AC}$ , the additive-genetic variance in the common factor; the 3 phenotypes' loadings onto the common factor,  $\lambda_1$ ,  $\lambda_2$ , and  $\lambda_3$ ; the 3 phenotypes' unique additive-genetic variance components,  $V_{A1}$ ,  $V_{A2}$ , and  $V_{A3}$ ; and the 3 phenotypes' unique nonshared-environmental variance components,  $V_{E1}$ ,  $V_{E2}$ , and  $V_{E3}$ . Let  $\mathbf{y}$  denote the vector of scores on the 3 phenotypes stacked on top of one another (i.e., "blocked by phenotype"). Let  $\boldsymbol{\lambda}$  denote a column vector of the 3 factor loadings, i.e.  $\boldsymbol{\lambda}^T = [\lambda_1 \quad \lambda_2 \quad \lambda_3]$ . Let  $\mathbf{A}$  denote the  $n \times n$

GRM, let  $\mathbf{I}$  denote an  $n \times n$  identity matrix, and let  $\mathbf{0}$  denote an  $n \times n$  matrix of zeroes. The model does not include any covariates.

Let  $\mathbf{V}$  denote the variance of  $\mathbf{y}$ ,

$$\mathbf{V} = \boldsymbol{\lambda}\boldsymbol{\lambda}^T \otimes \text{var}(\mathbf{F}) + \text{var}(\mathbf{U})$$

, where  $\mathbf{F}$  is a random column vector of  $n$  common-factor scores, and  $\mathbf{U}$  is a random column vector of  $3n$  unique-factor scores. The variance of  $\mathbf{U}$  is straightforward:

$$\text{var}(\mathbf{U}) = \begin{bmatrix} \mathbf{A}V_{A1} & \mathbf{0} & \mathbf{0} \\ \mathbf{0} & \mathbf{A}V_{A2} & \mathbf{0} \\ \mathbf{0} & \mathbf{0} & \mathbf{A}V_{A3} \end{bmatrix} + \begin{bmatrix} \mathbf{I}V_{E1} & \mathbf{0} & \mathbf{0} \\ \mathbf{0} & \mathbf{I}V_{E2} & \mathbf{0} \\ \mathbf{0} & \mathbf{0} & \mathbf{I}V_{E3} \end{bmatrix}$$

. The variance of  $\mathbf{F}$  is:

$$\text{var}(\mathbf{F}) = (\mathbf{A}V_{AC} + \mathbf{I}[1 - V_{AC}])$$

. The common variance in  $\mathbf{y}$ ,  $\boldsymbol{\lambda}\boldsymbol{\lambda}^T \otimes (\mathbf{A}V_{AC} + \mathbf{I}[1 - V_{AC}])$ , can be expressed as

$$\begin{bmatrix} \lambda_1^2 & \lambda_1\lambda_2 & \lambda_1\lambda_3 \\ \lambda_2\lambda_1 & \lambda_2^2 & \lambda_2\lambda_3 \\ \lambda_3\lambda_1 & \lambda_3\lambda_2 & \lambda_3^2 \end{bmatrix} \otimes (\mathbf{A}V_{AC} + \mathbf{I}[1 - V_{AC}])$$

, or equivalently,

$$\begin{bmatrix} \mathbf{A}\lambda_1^2 & \mathbf{A}\lambda_1\lambda_2 & \mathbf{A}\lambda_1\lambda_3 \\ \mathbf{A}\lambda_2\lambda_1 & \mathbf{A}\lambda_2^2 & \mathbf{A}\lambda_2\lambda_3 \\ \mathbf{A}\lambda_3\lambda_1 & \mathbf{A}\lambda_3\lambda_2 & \mathbf{A}\lambda_3^2 \end{bmatrix} V_{AC} + \begin{bmatrix} \mathbf{I}\lambda_1^2 & \mathbf{I}\lambda_1\lambda_2 & \mathbf{I}\lambda_1\lambda_3 \\ \mathbf{I}\lambda_2\lambda_1 & \mathbf{I}\lambda_2^2 & \mathbf{I}\lambda_2\lambda_3 \\ \mathbf{I}\lambda_3\lambda_1 & \mathbf{I}\lambda_3\lambda_2 & \mathbf{I}\lambda_3^2 \end{bmatrix} (1 - V_{AC})$$

We now have the following first partial derivatives of  $\mathbf{V}$ . The derivatives with respect to the unique-factor variance components are quite simple:

$$\begin{aligned} \frac{\partial \mathbf{V}}{\partial V_{A1}} &= \begin{bmatrix} \mathbf{A} & \mathbf{0} & \mathbf{0} \\ \mathbf{0} & \mathbf{0} & \mathbf{0} \\ \mathbf{0} & \mathbf{0} & \mathbf{0} \end{bmatrix} \\ \frac{\partial \mathbf{V}}{\partial V_{A2}} &= \begin{bmatrix} \mathbf{0} & \mathbf{0} & \mathbf{0} \\ \mathbf{0} & \mathbf{A} & \mathbf{0} \\ \mathbf{0} & \mathbf{0} & \mathbf{0} \end{bmatrix} \\ \frac{\partial \mathbf{V}}{\partial V_{A3}} &= \begin{bmatrix} \mathbf{0} & \mathbf{0} & \mathbf{0} \\ \mathbf{0} & \mathbf{0} & \mathbf{0} \\ \mathbf{0} & \mathbf{0} & \mathbf{A} \end{bmatrix} \\ \frac{\partial \mathbf{V}}{\partial V_{E1}} &= \begin{bmatrix} \mathbf{I} & \mathbf{0} & \mathbf{0} \\ \mathbf{0} & \mathbf{0} & \mathbf{0} \\ \mathbf{0} & \mathbf{0} & \mathbf{0} \end{bmatrix} \\ \frac{\partial \mathbf{V}}{\partial V_{E2}} &= \begin{bmatrix} \mathbf{0} & \mathbf{0} & \mathbf{0} \\ \mathbf{0} & \mathbf{I} & \mathbf{0} \\ \mathbf{0} & \mathbf{0} & \mathbf{0} \end{bmatrix} \\ \frac{\partial \mathbf{V}}{\partial V_{E3}} &= \begin{bmatrix} \mathbf{0} & \mathbf{0} & \mathbf{0} \\ \mathbf{0} & \mathbf{0} & \mathbf{0} \\ \mathbf{0} & \mathbf{0} & \mathbf{I} \end{bmatrix} \end{aligned}$$

. The derivative of  $\mathbf{V}$  with respect to  $V_{AC}$  is,

$$\frac{\partial \mathbf{V}}{\partial V_{AC}} = \begin{bmatrix} \lambda_1^2 & \lambda_1\lambda_2 & \lambda_1\lambda_3 \\ \lambda_2\lambda_1 & \lambda_2^2 & \lambda_2\lambda_3 \\ \lambda_3\lambda_1 & \lambda_3\lambda_2 & \lambda_3^2 \end{bmatrix} \otimes (\mathbf{A} - \mathbf{I})$$

, or less compactly,

$$= \begin{bmatrix} \mathbf{A}\lambda_1^2 & \mathbf{A}\lambda_1\lambda_2 & \mathbf{A}\lambda_1\lambda_3 \\ \mathbf{A}\lambda_2\lambda_1 & \mathbf{A}\lambda_2^2 & \mathbf{A}\lambda_2\lambda_3 \\ \mathbf{A}\lambda_3\lambda_1 & \mathbf{A}\lambda_3\lambda_2 & \mathbf{A}\lambda_3^2 \end{bmatrix} - \begin{bmatrix} \mathbf{I}\lambda_1^2 & \mathbf{I}\lambda_1\lambda_2 & \mathbf{I}\lambda_1\lambda_3 \\ \mathbf{I}\lambda_2\lambda_1 & \mathbf{I}\lambda_2^2 & \mathbf{I}\lambda_2\lambda_3 \\ \mathbf{I}\lambda_3\lambda_1 & \mathbf{I}\lambda_3\lambda_2 & \mathbf{I}\lambda_3^2 \end{bmatrix}$$

. The derivative of  $\mathbf{V}$  with respect to the factor loadings are:

$$\frac{\partial \mathbf{V}}{\partial \lambda_1} = \begin{bmatrix} 2\lambda_1 & \lambda_2 & \lambda_3 \\ \lambda_2 & 0 & 0 \\ \lambda_3 & 0 & 0 \end{bmatrix} \otimes (\mathbf{A}V_{AC} + \mathbf{I}[1 - V_{AC}])$$

$$= \begin{bmatrix} \text{var}(\mathbf{F})2\lambda_1 & \text{var}(\mathbf{F})\lambda_2 & \text{var}(\mathbf{F})\lambda_3 \\ \text{var}(\mathbf{F})\lambda_2 & \mathbf{0} & \mathbf{0} \\ \text{var}(\mathbf{F})\lambda_3 & \mathbf{0} & \mathbf{0} \end{bmatrix}$$

$$\frac{\partial \mathbf{V}}{\partial \lambda_2} = \begin{bmatrix} 0 & \lambda_1 & 0 \\ \lambda_1 & 2\lambda_2 & \lambda_3 \\ 0 & \lambda_3 & 0 \end{bmatrix} \otimes (\mathbf{A}V_{AC} + \mathbf{I}[1 - V_{AC}])$$

$$= \begin{bmatrix} \mathbf{0} & \text{var}(\mathbf{F})\lambda_1 & \mathbf{0} \\ \text{var}(\mathbf{F})\lambda_1 & \text{var}(\mathbf{F})2\lambda_2 & \text{var}(\mathbf{F})\lambda_3 \\ \mathbf{0} & \text{var}(\mathbf{F})\lambda_3 & \mathbf{0} \end{bmatrix}$$

$$\frac{\partial \mathbf{V}}{\partial \lambda_3} = \begin{bmatrix} 0 & 0 & \lambda_1 \\ 0 & 0 & \lambda_2 \\ \lambda_1 & \lambda_2 & 2\lambda_3 \end{bmatrix} \otimes (\mathbf{A}V_{AC} + \mathbf{I}[1 - V_{AC}])$$

$$= \begin{bmatrix} \mathbf{0} & \mathbf{0} & \text{var}(\mathbf{F})\lambda_1 \\ \mathbf{0} & \mathbf{0} & \text{var}(\mathbf{F})\lambda_2 \\ \text{var}(\mathbf{F})\lambda_1 & \text{var}(\mathbf{F})\lambda_2 & \text{var}(\mathbf{F})2\lambda_3 \end{bmatrix}$$

**Supplementary References**

Meyer, K., & Smith, S.P. (1996). Restricted maximum likelihood estimation for animal models using derivatives of the likelihood. *Genetics Selection Evolution* 28: 23-49.

Figure S1. “Common-Pathway Model” (scripts #2 and #3 in Table I).

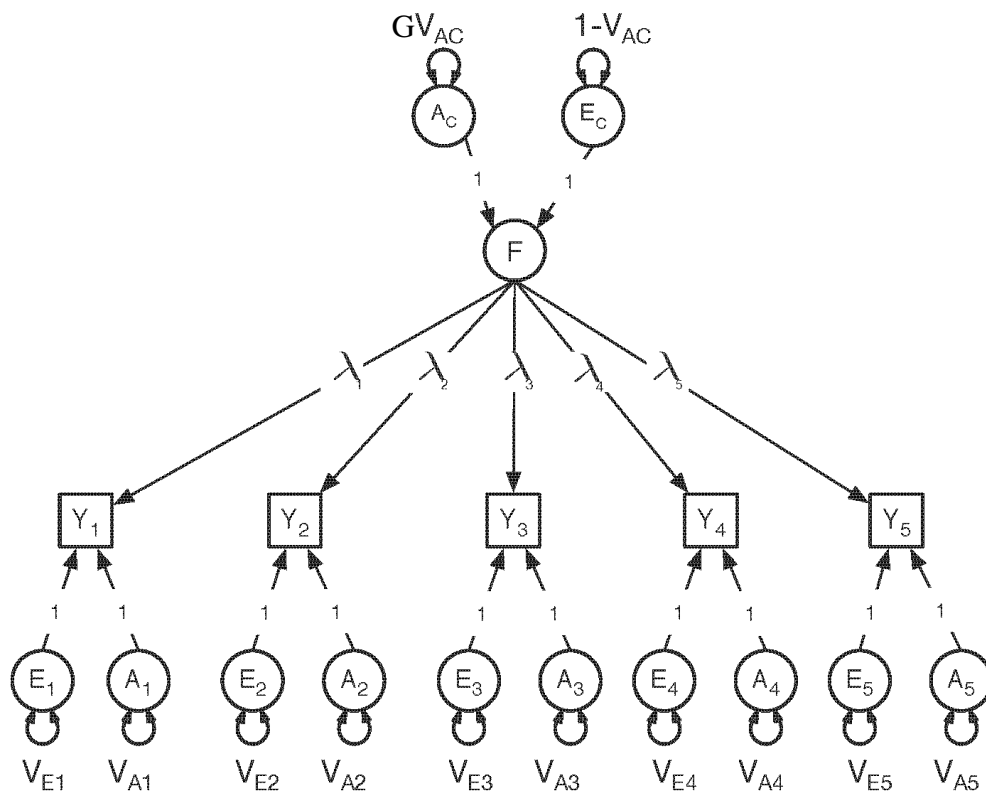

The  $\lambda$ s are factor loadings,  $V_{AC}$  is the heritability of the common factor, the  $V_{A_i}$ s are unique additive-genetic variance components, the  $V_{E_i}$ s are unique nonshared-environmental variance components, and  $G$  is the given individual's diagonal GRM element. The scale of the common factor is identified by defining its nonshared-environmental variance to be  $1 - V_{AC}$ .

Figure S2. “Biometric Moderation Model” (scripts #6 and #7 in Table I).

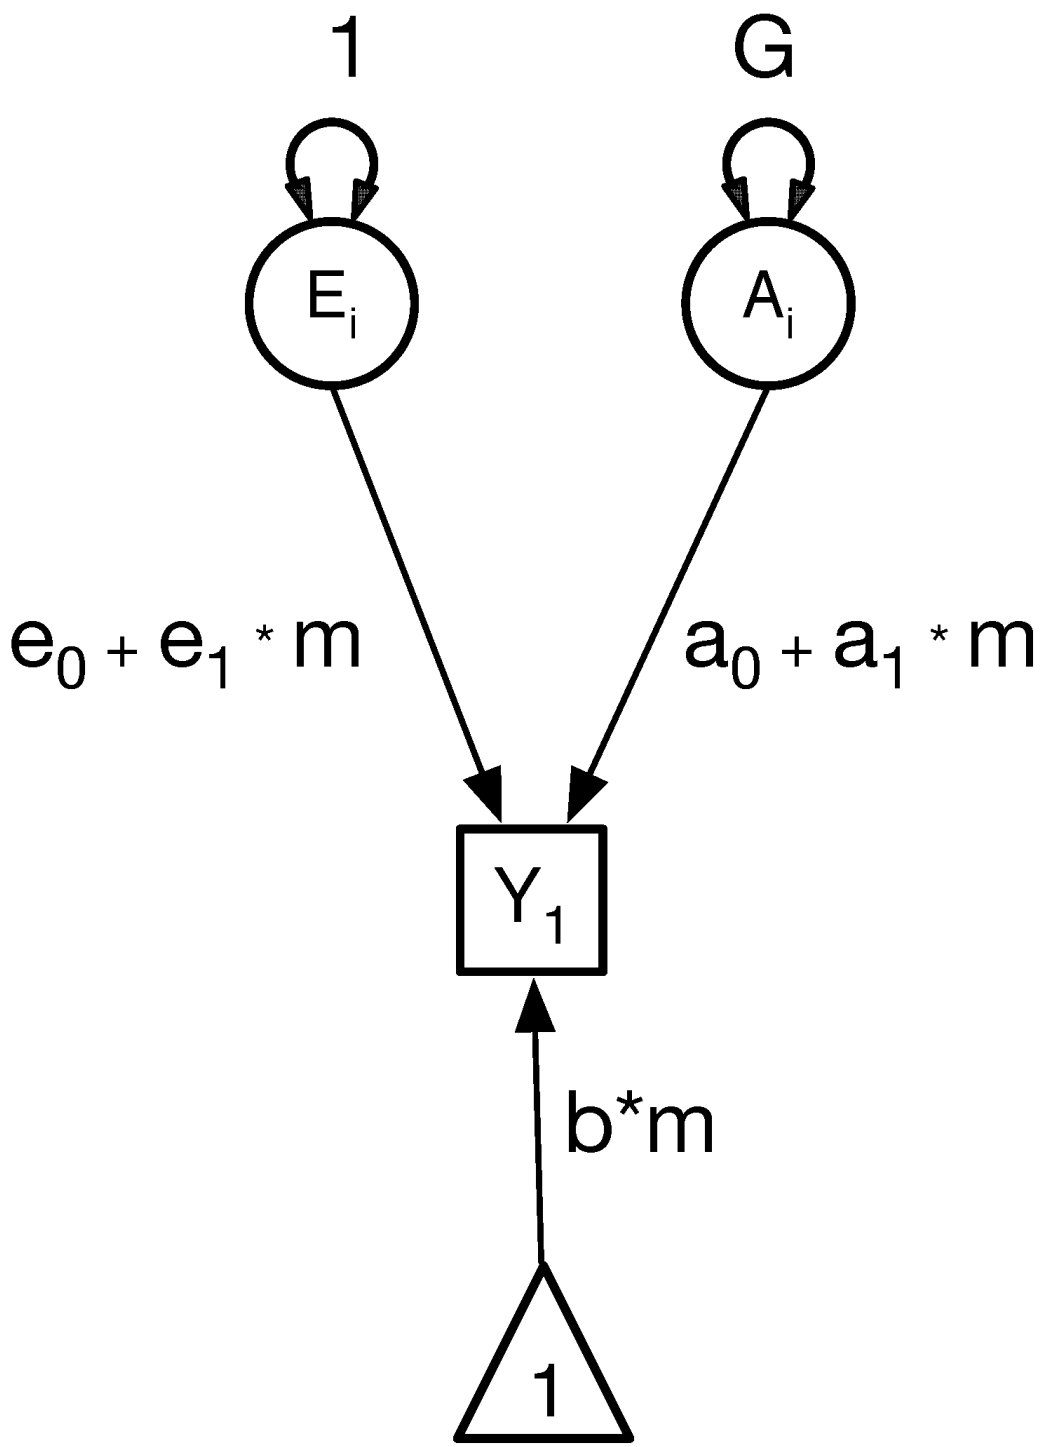

In this model, the moderator,  $m$ , is treated as exogenous.  $a_0$  and  $a_1$  are respectively the unmoderated and moderated additive-genetic path coefficients,  $e_0$  and  $e_1$  are respectively the unmoderated and moderated nonshared-environmental path coefficients,  $b * m$  represents the main effect of the moderator, and  $G$  is the given individual’s diagonal GRM element.



Figure S3. “Latent-Growth Curve Model” (scripts #11 and #12 in Table I).

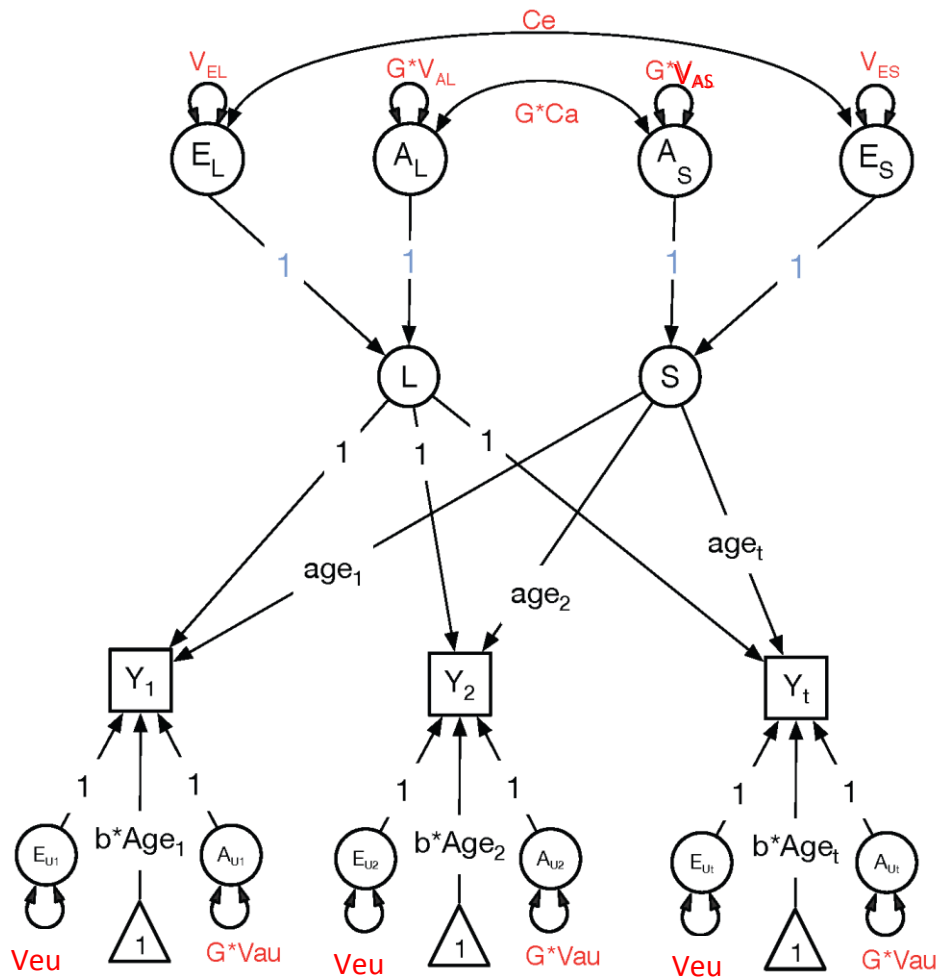

This diagram depicts timepoints 1, 2, and  $t$ ; scripts #11 and #12 have  $t=5$  timepoints. In this model, age at timepoint is the time metric.  $G$  is the given individual’s diagonal GRM element,  $V_{AL}$  is additive-genetic latent-intercept variance,  $V_{EL}$  is nonshared-environmental latent-intercept variance,  $V_{AS}$  is additive-genetic latent-slope variance,  $V_{ES}$  is nonshared-environmental latent-slope variance,  $C_a$  is additive-genetic intercept-slope covariance,  $C_e$  is nonshared-environmental intercept-slope covariance,  $V_{au}$  is additive-genetic residual variance, and  $V_{eu}$  is nonshared-environmental residual variance.

Figure S4. “Independent-Pathway Model” (scripts #13 and #14 in Table I).

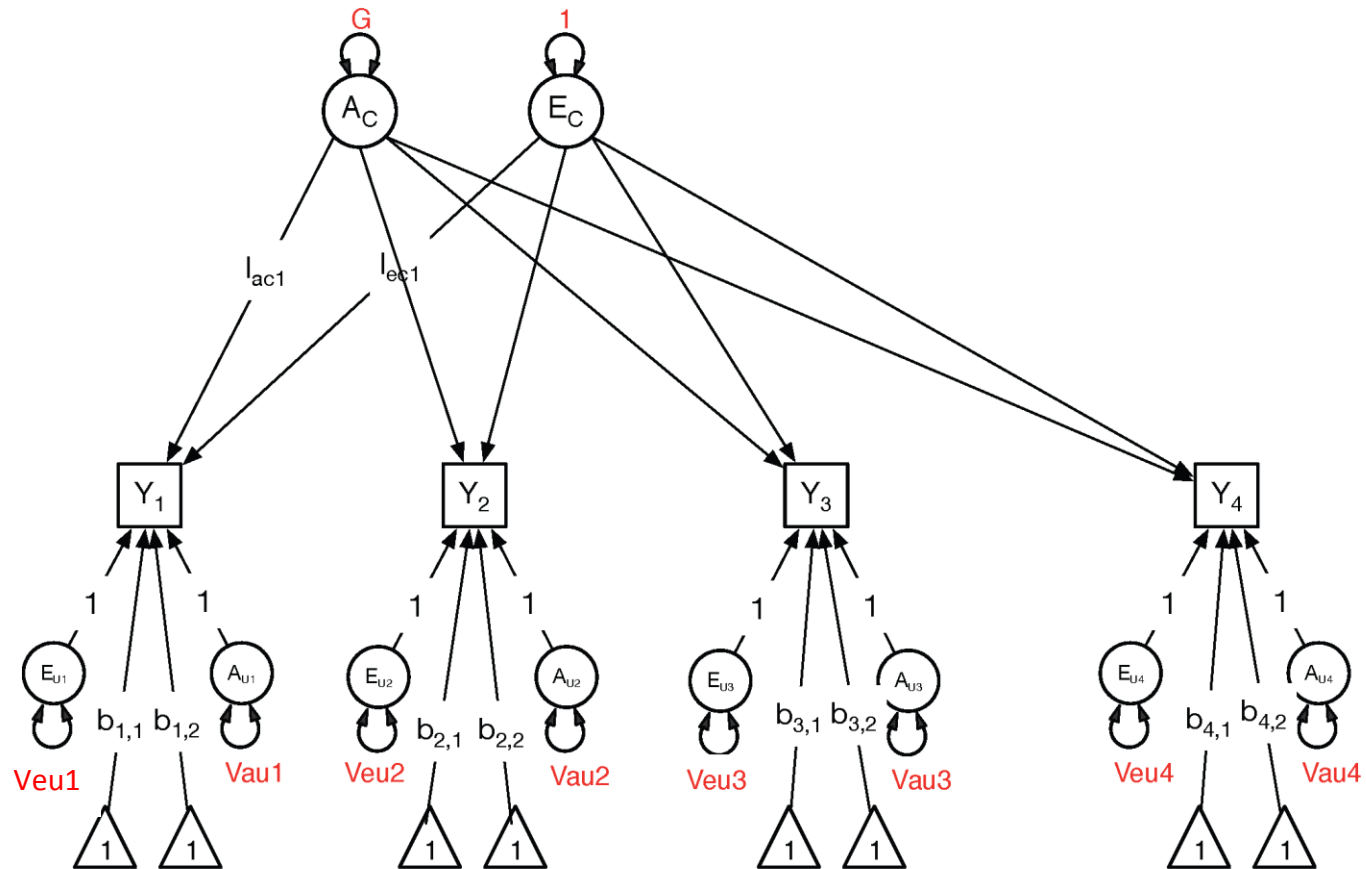

$G$  is the given individual's diagonal GRM element. Phenotype  $Y_i$ 's loading onto the additive-genetic and nonshared-environmental common factors are respectively denoted by  $l_{aci}$  and  $l_{eci}$  (only depicted for  $Y_1$ ). Phenotype  $Y_i$ 's additive-genetic and nonshared-environmental unique-factor variances are respectively denoted by  $V_{au_i}$  and  $V_{eu_i}$ .

Figure S5. “Saturated Diphenotype Model” (script #4 in Table I)

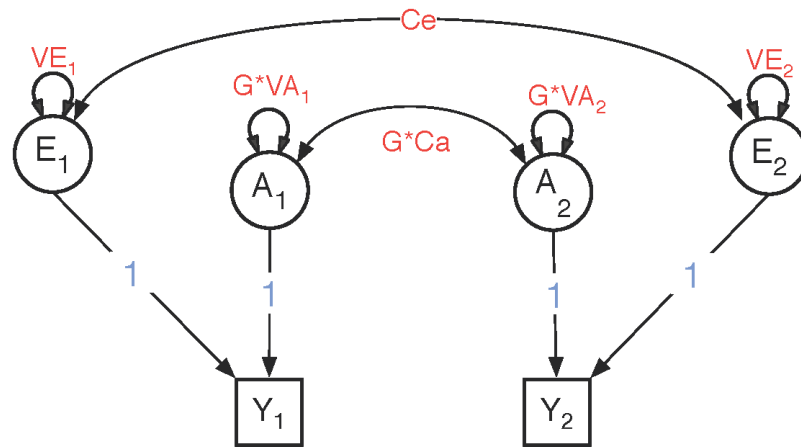

$G$  is the given individual's diagonal GRM element.  $V_{A_1}$  and  $V_{A_2}$  are the additive-genetic variances of  $Y_1$  and  $Y_2$ , respectively, whereas  $V_{E_1}$  and  $V_{E_2}$  are likewise their respective nonshared-environmental variances.  $C_a$  and  $C_e$  are the two phenotypes' additive-genetic and nonshared-environmental covariances.
